# Supplementary figures and images for: Theoretical study of chloride complexes with hybrid macrocycles
Source: Royal Society of Chemistry journal article supplement (doi:10.1039/d0nj05234e), 2020-11-23

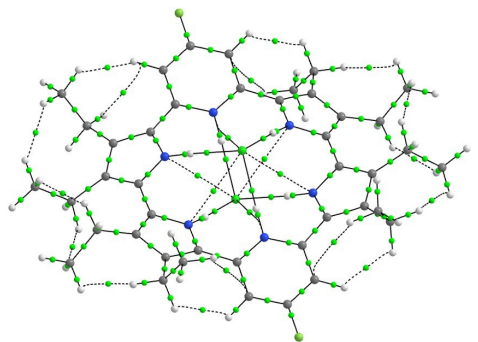

**5**...2Cl<sup>-</sup>

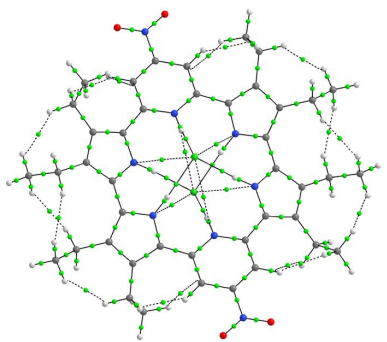

**6**...2Cl<sup>-</sup>

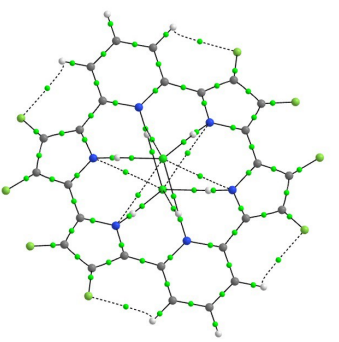

**7**...2Cl<sup>-</sup>

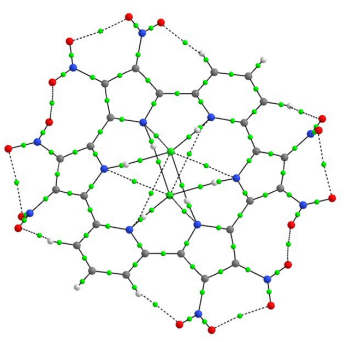

**8**...2Cl<sup>-</sup>

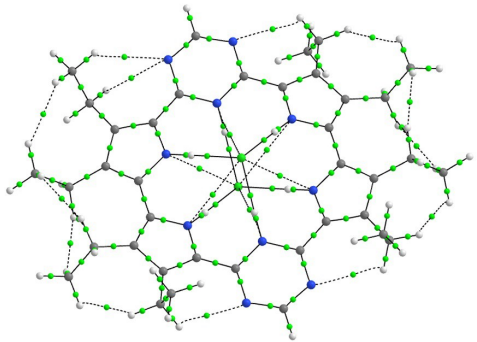

**9**...2Cl<sup>-</sup>

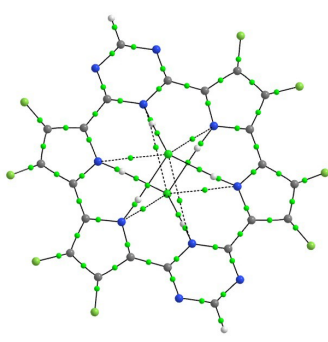

**10**...2Cl<sup>-</sup>

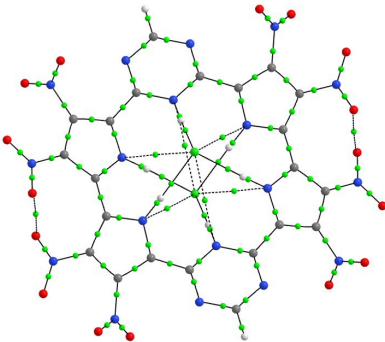

**11**...2Cl<sup>-</sup>

Supplement: d0nj05234e10.pdf [file d0nj05234e10.pdf]

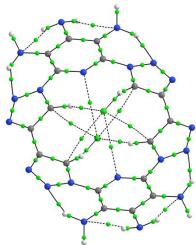

**13**...2Cl<sup>-</sup>

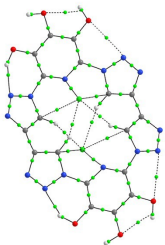

**14**...2Cl<sup>-</sup>

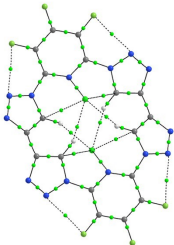

**15**...2Cl<sup>-</sup>

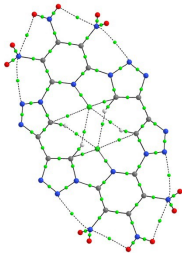

**16**...2Cl<sup>-</sup>

Supplement: d0nj05234e11.pdf [file d0nj05234e11.pdf]

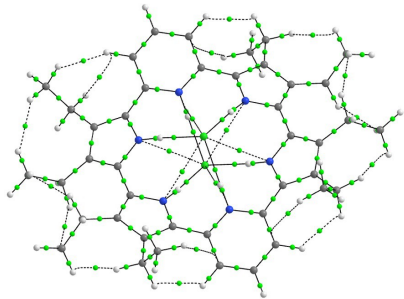

(a)

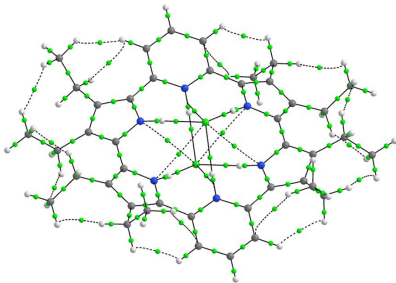

(b)

Supplement: d0nj05234e4.pdf [file d0nj05234e4.pdf]

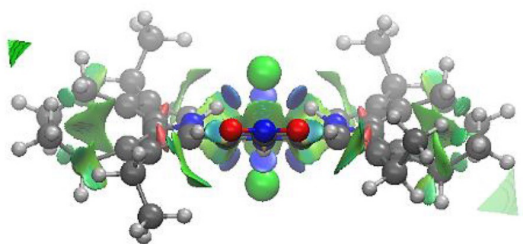

**6**···2Cl<sup>-</sup>

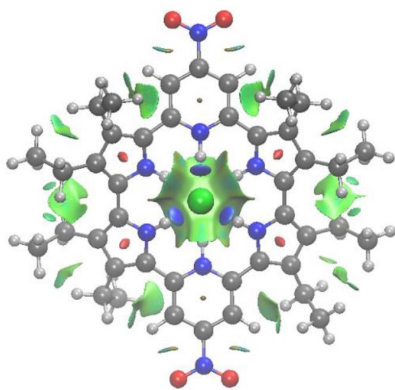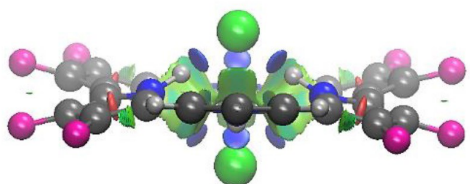

**7**···2Cl<sup>-</sup>

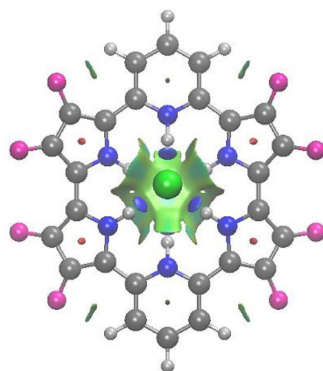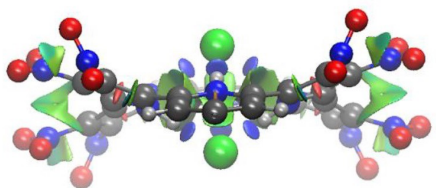

**8**···2Cl<sup>-</sup>

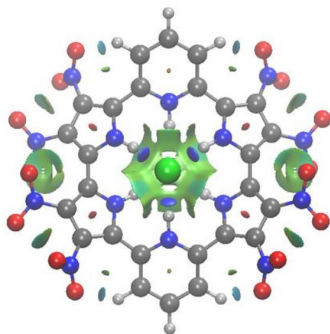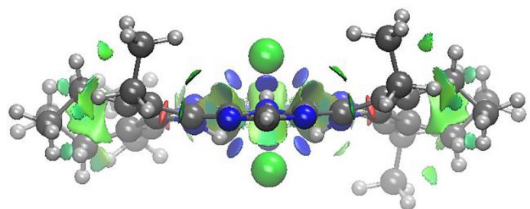

**9**···2Cl<sup>-</sup>

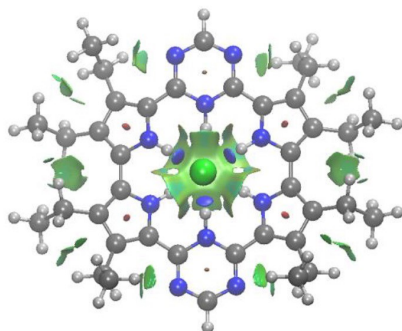

Supplement: d0nj05234e6.pdf [file d0nj05234e6.pdf]

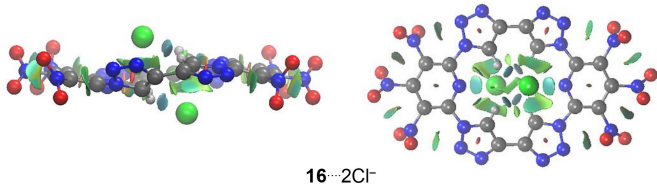

Supplement: d0nj05234e8.pdf [file d0nj05234e8.pdf]
